# Supplementary material for: Physical Activity and Its Potential Determinants in Obese Children and Adolescents under Specialist Outpatient Care—A Pilot Cross-Sectional Study
Source: MDPI journal article supplement (doi:10.3390/healthcare12020260), 2024-01-19
Supplement: s1 [file s1]

**Table S1.** A stepwise backward method in building the final regression model – steps from 1 to 10.

| Variable                                                                | F to<br>remove | p-value<br>to<br>remove | effect       |
|-------------------------------------------------------------------------|----------------|-------------------------|--------------|
| <b>STEP 1</b>                                                           |                |                         |              |
| Gender                                                                  | 0.539          | 0.466                   | in model     |
| Age                                                                     | 3.081          | 0.084                   | in model     |
| At least one parent with<br>higher education                            | 0.405          | 0.527                   | in model     |
| Mother's working status                                                 | 1.438          | 0.235                   | in model     |
| Father's working status                                                 | 0.777          | 0.381                   | in model     |
| At least one obese parent                                               | 0.522          | 0.473                   | in model     |
| Place of residence                                                      | 1.056          | 0.374                   | in model     |
| Distance from home to<br>school                                         | 0.008          | 0.992                   | to remove    |
| Mode of commuting to<br>school                                          | 0.022          | 0.882                   | in model     |
| At least one parent with<br>moderate or high physical<br>activity level | 0.234          | 0.630                   | in model     |
| <b>STEP 2</b>                                                           |                |                         |              |
| Gender                                                                  | 0.545          | 0.463                   | in model     |
| Age                                                                     | 3.501          | 0.066                   | in model     |
| At least one parent with<br>higher education                            | 0.424          | 0.517                   | in model     |
| Mother's working status                                                 | 1.610          | 0.209                   | in model     |
| Father's working status                                                 | 0.789          | 0.378                   | in model     |
| At least one obese parent                                               | 0.557          | 0.458                   | in model     |
| Place of residence                                                      | 1.100          | 0.356                   | in model     |
| Distance from home to<br>school                                         |                |                         | out of model |
| Mode of commuting to<br>school                                          | 0.141          | 0.708                   | to remove    |

|                                                                   |       |       |              |
|-------------------------------------------------------------------|-------|-------|--------------|
| At least one parent with moderate or high physical activity level | 0.232 | 0.632 | in model     |
| <b>STEP 3</b>                                                     |       |       |              |
| Gender                                                            | 0.676 | 0.414 | in model     |
| Age                                                               | 3.588 | 0.063 | in model     |
| At least one parent with higher education                         | 0.424 | 0.517 | in model     |
| Mother's working status                                           | 1.743 | 0.192 | in model     |
| Father's working status                                           | 0.825 | 0.367 | in model     |
| At least one obese parent                                         | 0.527 | 0.471 | in model     |
| Place of residence                                                | 1.260 | 0.296 | in model     |
| Distance from home to school                                      |       |       | out of model |
| Mode of commuting to school                                       |       |       | out of model |
| At least one parent with moderate or high physical activity level | 0.203 | 0.654 | to remove    |
| <b>STEP 4</b>                                                     |       |       |              |
| Gender                                                            | 0.645 | 0.425 | in model     |
| Age                                                               | 4.618 | 0.035 | in model     |
| At least one parent with higher education                         | 0.506 | 0.474 | to remove    |
| Mother's working status                                           | 1.881 | 0.175 | in model     |
| Father's working status                                           | 0.795 | 0.376 | in model     |
| At least one obese parent                                         | 0.652 | 0.422 | in model     |
| Place of residence                                                | 1.320 | 0.276 | in model     |
| Distance from home to school                                      |       |       | out of model |
| Mode of commuting to school                                       |       |       | out of model |
| At least one parent with moderate or high physical activity level |       |       | out of model |
| <b>STEP 5</b>                                                     |       |       |              |

|                                                                   |       |       |              |
|-------------------------------------------------------------------|-------|-------|--------------|
| Gender                                                            | 0.983 | 0.325 | in model     |
| Age                                                               | 4.696 | 0.034 | in model     |
| At least one parent with higher education                         |       |       | out of model |
| Mother's working status                                           | 2.675 | 0.107 | in model     |
| Father's working status                                           | 1.035 | 0.313 | in model     |
| At least one obese parent                                         | 0.546 | 0.463 | to remove    |
| Place of residence                                                | 1.286 | 0.287 | in model     |
| Distance from home to school                                      |       |       | out of model |
| Mode of commuting to school                                       |       |       | out of model |
| At least one parent with moderate or high physical activity level |       |       | out of model |
| <b>STEP 6</b>                                                     |       |       |              |
| Gender                                                            | 1.064 | 0.306 | in model     |
| Age                                                               | 4.420 | 0.039 | in model     |
| At least one parent with higher education                         |       |       | out of model |
| Mother's working status                                           | 2.657 | 0.108 | in model     |
| Father's working status                                           | 0.884 | 0.350 | to remove    |
| At least one obese parent                                         |       |       | out of model |
| Place of residence                                                | 1.318 | 0.276 | in model     |
| Distance from home to school                                      |       |       | out of model |
| Mode of commuting to school                                       |       |       | out of model |
| At least one parent with moderate or high physical activity level |       |       | out of model |
| <b>STEP 7</b>                                                     |       |       |              |
| Gender                                                            | 1.120 | 0.294 | to remove    |
| Age                                                               | 4.822 | 0.032 | in model     |
| At least one parent with higher education                         |       |       | out of model |

|                                                                   |       |       |              |
|-------------------------------------------------------------------|-------|-------|--------------|
| Mother's working status                                           | 2.424 | 0.124 | in model     |
| Father's working status                                           |       |       | out of model |
| At least one obese parent                                         |       |       | out of model |
| Place of residence                                                | 1.322 | 0.274 | in model     |
| Distance from home to school                                      |       |       | out of model |
| Mode of commuting to school                                       |       |       | out of model |
| At least one parent with moderate or high physical activity level |       |       | out of model |
| <b>STEP 8</b>                                                     |       |       |              |
| Gender                                                            |       |       | out of model |
| Age                                                               | 4.661 | 0.034 | in model     |
| At least one parent with higher education                         |       |       | out of model |
| Mother's working status                                           | 2.391 | 0.127 | in model     |
| Father's working status                                           |       |       | out of model |
| At least one obese parent                                         |       |       | out of model |
| Place of residence                                                | 1.065 | 0.370 | to remove    |
| Distance from home to school                                      |       |       | out of model |
| Mode of commuting to school                                       |       |       | out of model |
| At least one parent with moderate or high physical activity level |       |       | out of model |
| <b>STEP 9</b>                                                     |       |       |              |
| Gender                                                            |       |       | out of model |
| Age                                                               | 4.534 | 0.037 | in model     |
| At least one parent with higher education                         |       |       | out of model |
| Mother's working status                                           | 3.235 | 0.076 | to remove    |
| Father's working status                                           |       |       | out of model |
| At least one obese parent                                         |       |       | out of model |
| Place of residence                                                |       |       | out of model |

|                                                                   |       |       |              |
|-------------------------------------------------------------------|-------|-------|--------------|
| Distance from home to school                                      |       |       | out of model |
| Mode of commuting to school                                       |       |       | out of model |
| At least one parent with moderate or high physical activity level |       |       | out of model |
| <b>STEP 10</b>                                                    |       |       |              |
| Gender                                                            |       |       | out of model |
| Age                                                               | 4.264 | 0.043 | in model     |
| At least one parent with higher education                         |       |       | out of model |
| Mother's working status                                           |       |       | out of model |
| Father's working status                                           |       |       | out of model |
| At least one obese parent                                         |       |       | out of model |
| Place of residence                                                |       |       | out of model |
| Distance from home to school                                      |       |       | out of model |
| Mode of commuting to school                                       |       |       | out of model |
| At least one parent with moderate or high physical activity level |       |       | out of model |
